# Supplementary material for: First principles study of BAs/MoSi2N4 van der Waals heterostructure: tunable electronic and optical properties via vertical strain
Source: Royal Society of Chemistry journal article supplement (doi:10.1039/d3cp03112h), 2023-01-01
Supplement: d3cp03112h1.pdf [file d3cp03112h1.pdf]

# First principles study of $\text{BA}/\text{MoSi}_2\text{N}_4$ van der Waals heterostructure: tunable electronic and optical properties via vertical strain

Yunxi Qi<sup>a</sup>, Can Yao<sup>a</sup>, Jun Zhao<sup>a</sup>, and Hui Zeng<sup>b</sup>

<sup>a</sup>New Energy Technology Engineering Laboratory of Jiangsu Province & School of Science, Nanjing University of Posts and Telecommunications, Nanjing, Jiangsu 210023, China

<sup>b</sup>School of Microelectronics, Nanjing University of Science and Technology, Nanjing, Jiangsu 210094, China

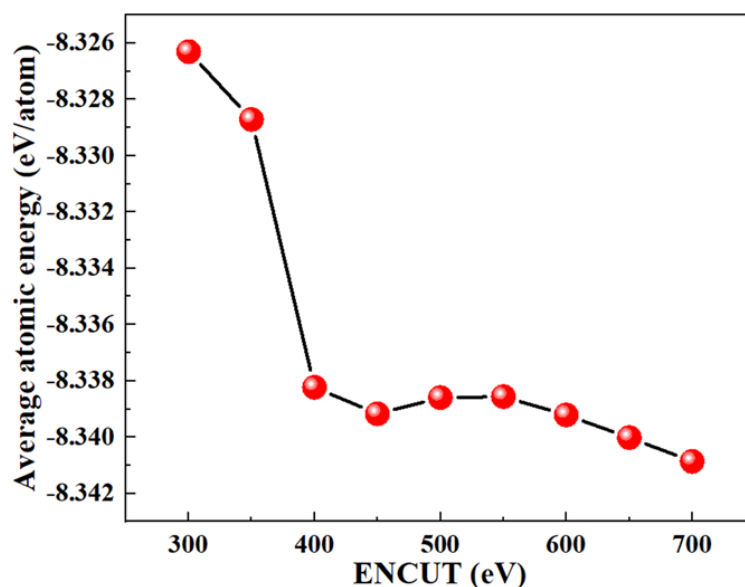

Fig. S1 Convergence test of  $\text{BA}/\text{MoSi}_2\text{N}_4$  heterostructure under different cut-off energies.

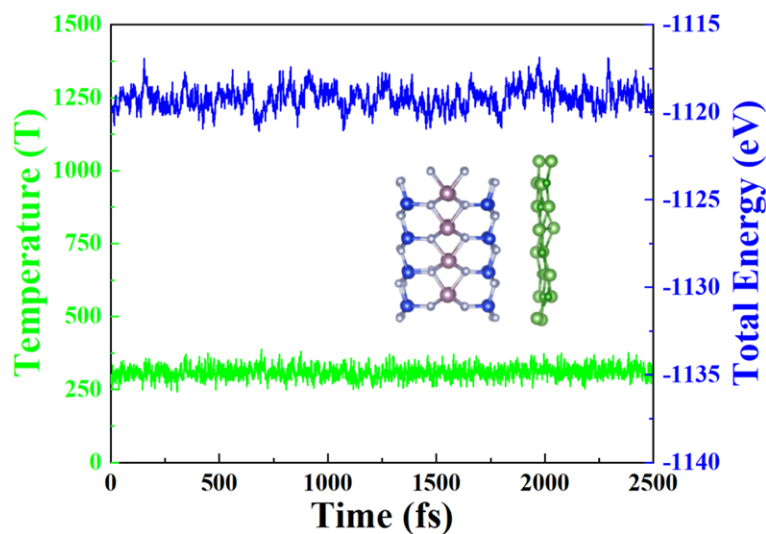

Fig. S2 The AIMD results of  $\text{A}_1$ -stacked  $\text{BA}/\text{MoSi}_2\text{N}_4$  heterostructure. The evolution

curves of total energy and temperature relative to simulation time are represented by blue and green lines, respectively. The insert shows the final snapshot of the heterostructure after 5 ps.

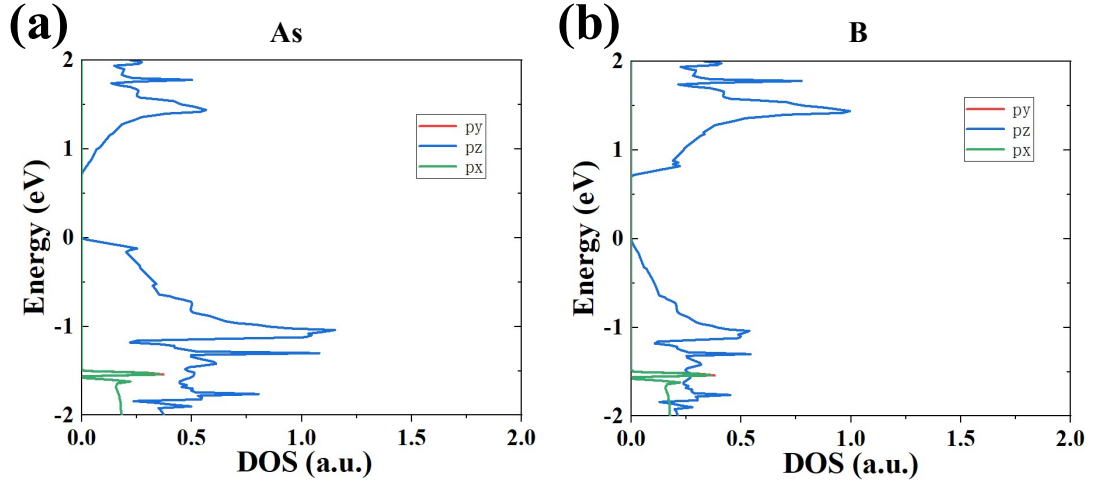

**Fig. S3** The density of states of B and As atoms in the  $\text{BAs}/\text{MoSi}_2\text{N}_4$  heterostructure.

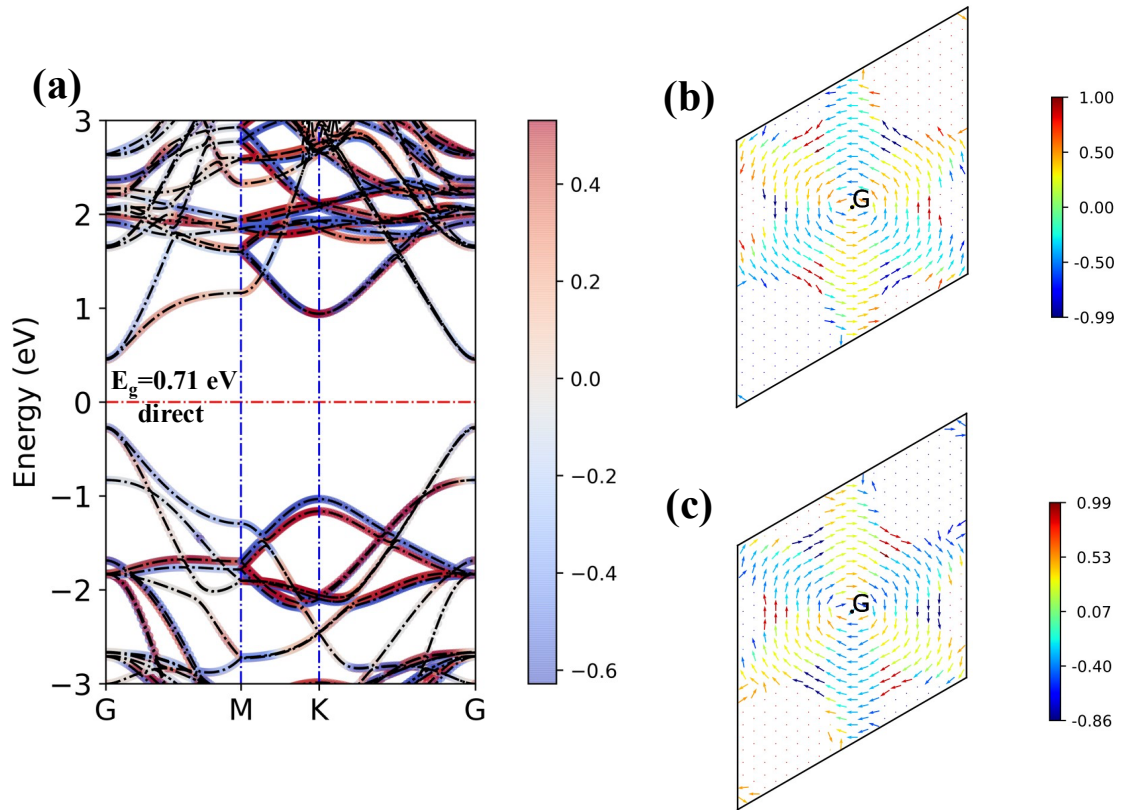

**Fig. S4** The band structure of the  $\text{BAs}/\text{MoSi}_2\text{N}_4$  heterostructure including SOC. Color represents the weight of  $S_z$  in the  $\text{BAs}/\text{MoSi}_2\text{N}_4$  heterostructure. The figure on the right shows the spin texture of (b) the highest occupation state and (c) the second highest occupation state near the G point in the Brillouin zone. The arrow represents the in-plane component of spin polarization, and the color represents the out of plane component of spin polarization.

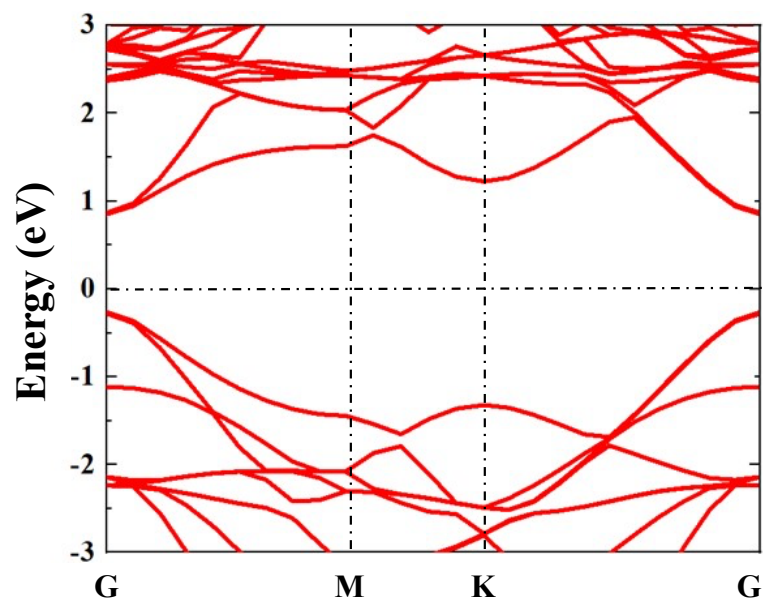

Fig. S5 HSE06 band structure of BA/MoSi<sub>2</sub>N<sub>4</sub> heterostructure.

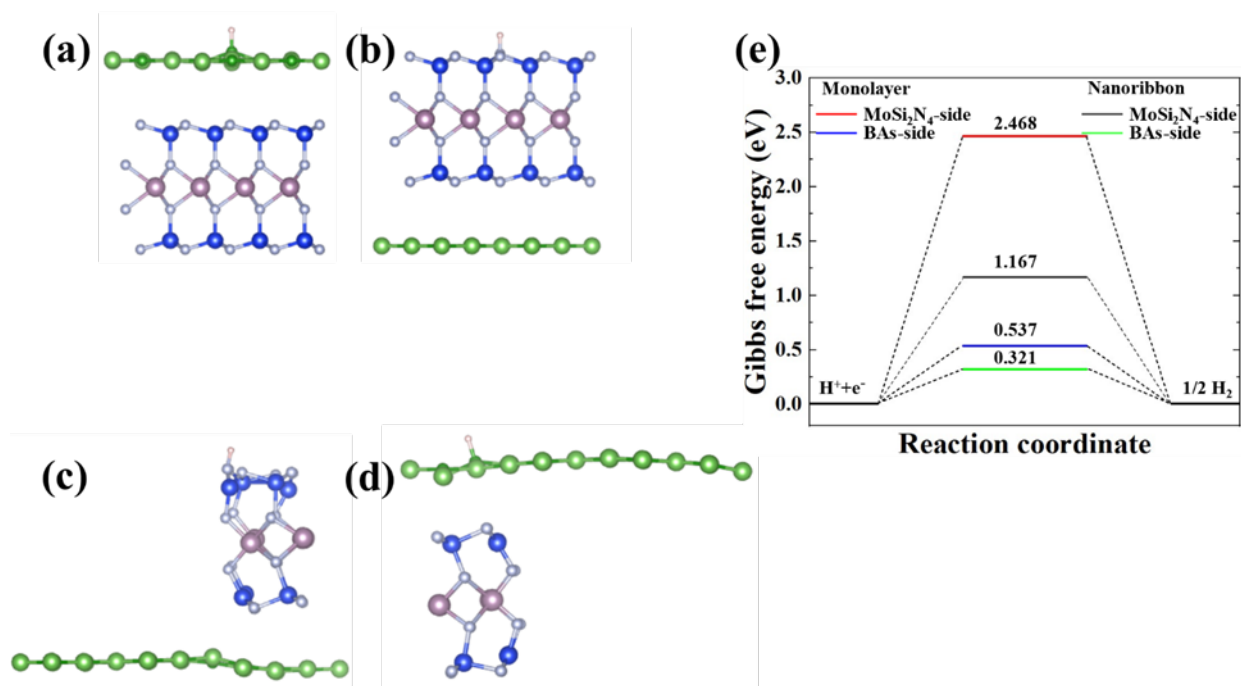

Fig. S6 (a –d) Side view of monolayer and ribbon BA/MoSi<sub>2</sub>N<sub>4</sub> heterostructures, with hydrogen atoms adsorbed at the most favorable positions on both sides. (e) Gibbs free energy distribution of HER on both sides of monolayer and ribbon BA/MoSi<sub>2</sub>N<sub>4</sub> heterostructures.

**Table S1** The lattice constants  $a$  and  $b$ , equilibrium distance  $D$ , bandgap  $E_g$ , and total energy  $E_t$  of the BAs/MoSi<sub>2</sub>N<sub>4</sub> heterostructure under different vacuum layer thicknesses.

| Vacuum Layer (Å) | $a = b$ (Å) | $D$ (Å) | $E_g$ (eV) | $E_t$ (eV) |
|------------------|-------------|---------|------------|------------|
| 15               | 5.83        | 3.9     | 0.721      | -283.9726  |
| 20               | 5.82        | 3.5     | 0.716      | -283.5109  |
| 25               | 5.82        | 3.5     | 0.717      | -283.4856  |
